# Supplementary material
Source: Springer Nature journal article supplement (https://www.springermedizin.de/resource/supplementary/12958_2003_2_MOESM1_ESM.pdf/9566190)

**A**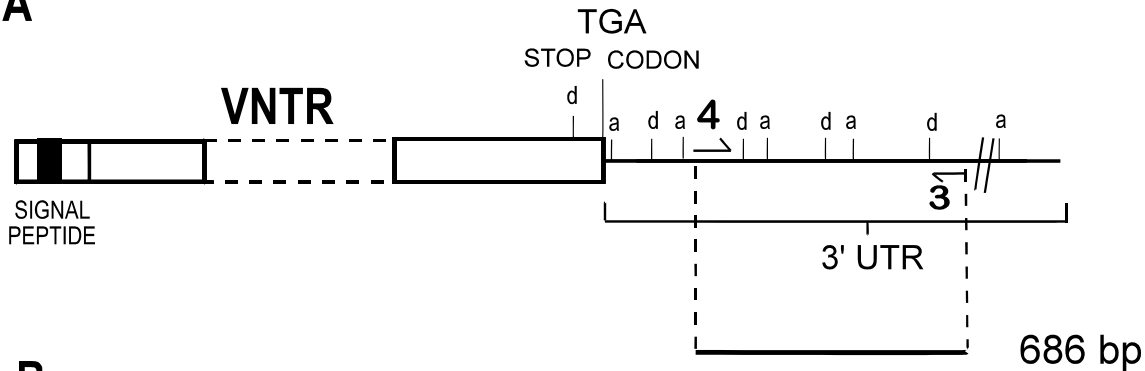**B**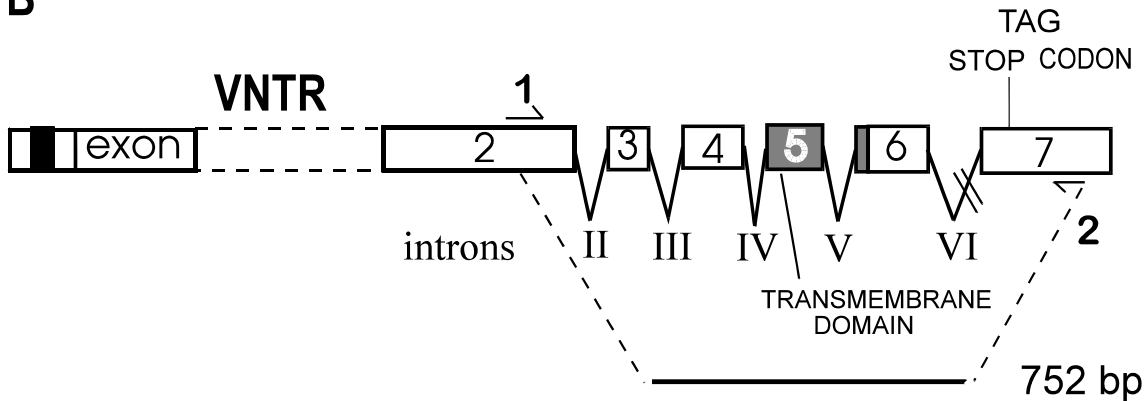

Supplement: MOESM1 [file 9566190]
